# Supplementary material for: A Rearrangement of the Mitochondrial Genes of Centipedes (Arthropoda, Myriapoda) with a Phylogenetic Analysis
Source: MDPI journal article supplement (doi:10.3390/genes13101787), 2022-10-03
Supplement: s1 [file s1]

*Supplementary Tables and Figures*

# **A Rearrangement of the Mitochondrial Genes of Centipedes (Arthropoda, Myriapoda) with a Phylogenetic Analysis**

**JiaJia Wang, Yu Bai and Yan Dong \***

College of Biology and Food Engineering, Chuzhou University, Chuzhou, China

\* Correspondence: dongyan\_bio@126.com

**Table S1.** GenBank accession numbers for taxa used in this study.

| Taxon       | Species                            | Accession No. | References |
|-------------|------------------------------------|---------------|------------|
| Chilopoda   | <i>Lithobius forficatus</i>        | NC_002629     | [1]        |
|             | <i>Bothropolys</i> sp.             | NC_009458     | [2]        |
|             | <i>Cermatobius longicornis</i>     | NC_021403     | [3]        |
|             | <i>Scutigera coleoptrata</i>       | NC_005870     | [4]        |
|             | <i>Scolopendra dehaani</i>         | KY947341      | [5]        |
|             | <i>Scolopendra mutilans</i>        | MN317390      | [6]        |
|             | <i>Scolopendra subspinipes</i>     | MN642577      | this study |
|             | <i>Scolopocryptops</i> sp.         | KC200076      | [7]        |
|             | <i>Strigamia maritima</i>          | NC_026557     | [8]        |
|             | <i>Mecistocephalus marmoratus</i>  | KX774322      | this study |
|             | <i>Scolopendra morsitans</i>       | MW810062      | [27]       |
|             | <i>Scolopocryptops</i> sp.         | KC200076      | [28]       |
| Diplopoda   | <i>Narceus annularus</i>           | NC_003343     | [9]        |
|             | <i>Thyropygus</i> sp.              | NC_003344     | [9]        |
|             | <i>Antrokoreana gracilipes</i>     | NC_010221     | [10]       |
|             | <i>Abacion magnum</i>              | NC_021932     | [11]       |
|             | <i>Brachycybe lecontii</i>         | NC_021934     | [11]       |
|             | <i>Appalachioria falcifera</i>     | NC_021933     | [11]       |
|             | <i>Asiomorpha coarctata</i>        | KU721885      | [12]       |
| Symphyla    | <i>Xystodesmus</i> sp.             | KU721886      | [12]       |
|             | <i>Scutigera</i> sp.               | NC_008453     | [13]       |
| Pauropoda   | <i>Symphylella</i> sp.             | NC_011572     | [14]       |
|             | <i>Pauropus longiramus</i>         | NC_016676     | [15]       |
| Chelicerata | <i>Pauropus longiramus</i>         | NC_016676     | [15]       |
|             | <i>Achella bituberculata</i>       | NC_009724     | [16]       |
|             | <i>Calisoga longitemsis</i>        | NC_010780     | [17]       |
|             | <i>Limulus polyphemus</i>          | NC_003057     | [18]       |
|             | <i>Tachyleus tridentatus</i>       | NC_012574     | [19]       |
| Crustacea   | <i>Phalangium opilio</i>           | NC_010766     | [17]       |
|             | <i>Penaeus monodon</i>             | NC_002184     | [20]       |
|             | <i>Hutchinsoniella macracantha</i> | NC_005937     | [21]       |
| Hexapoda    | <i>Petrobius brevistylis</i>       | NC_007688     | [22]       |
|             | <i>Thermobia domestica</i>         | NC_006080     | [23]       |
|             | <i>Drosophila yakuba</i>           | NC_001322     | [24]       |
|             | <i>Japyx solifugus</i>             | NC_007214     | [25]       |
| Onychophora | <i>Epiperipatus biolleyi</i>       | NC_009082     | [13]       |
| Priapulida  | <i>Priapulus caudatus</i>          | NC_008557     | [26]       |

## References

1. Lavrov, D.V.; Brown, W.M.; Boore, J.L. A novel type of RNA editing occurs in the mitochondrial tRNAs of the centipede *Lithobius forficatus*. *Proc. Natl. Acad. Sci. USA* **2000**, *97*, 13738–13742.
2. Park, S.J.; Choi, E.H.; Hwang, J.S.; Hwang, U.W. The complete mitochondrial genome of a centipede *Bothropolys* sp. (Chilopoda, Lithobiomorpha, Lithobiidae). *Mitochondrial DNA Part A* **2016**, *27*, 2268–2269.
3. Gai, Y.; Ma, H.; Sun, X.; Ma, J.; Li, C.; Yang, Q. The complete mitochondrial genome of *Cermatobius longicornis* (Chilopoda: Lithobiomorpha: Henicopidae). *Mitochondrial DNA* **2013**, *24*, 331–332.
4. Negrisolo, E.; Minelli, A.; Valle, G. The mitochondrial genome of the house centipede *Scutigera* and the monophyly versus paraphyly of myriapods. *Mol. Biol. Evol.* **2004**, *21*, 770–780.
5. Sun, L.; Qi, Y.; Tian, X. Analysis of mitochondrial genome of *Scolopendra subspinipes dehaani*. *Tianjin J. Tradit. Chin. Med.* **2018**, *35*, 225–229.
6. Hu, C.; Wang, S.; Huang, B.; Liu, H.; Xu, L.; Hu, Z.; Liu, Y. The complete mitochondrial genome sequence of *Scolopendra mutilans* L. Koch, 1878 (Scolopendromorpha, Scolopendridae), with a comparative analysis of other centipede genomes. *ZooKeys* **2020**, *925*, 73–88.
7. Gai, Y.; Ma, H.; Ma, J.; Li, C.; Yang, Q. The complete mitochondrial genome of *Scolopocryptops* sp. (Chilopoda: Scolopendromorpha: Scolopocryptopidae). *Mitochondrial DNA* **2014**, *25*, 192–193.
8. Robertson, H.E.; Lapraz, F.; Rhodes, A.C.; Telford, M.J. The complete mitochondrial genome of the geophilomorph centipede *Strigamia maritima*. *PLoS ONE* **2015**, *10*, e0121369.
9. Lavrov, D.V.; Boore, J.L.; Brown, W.M. Complete mtDNA sequences of two *millipedes* suggest a new model for mitochondrial gene rearrangements: duplication and nonrandom loss. *Mol. Biol. Evol.* **2002**, *19*, 163–169.
10. Woo, H.J.; Lee, Y.S.; Park, S.J.; Lim, J.T.; Jang, K.H.; Choi, E.H.; Choi, Y.G.; Hwang, U.W. Complete mitochondrial genome of a troglobite millipede *Antrokoorea gracilipes* (Diplopoda, Juliformia, Julida), and juliformian phylogeny. *Mol. Cells* **2007**, *23*, 182–191.
11. Brewer, M.S.; Swafford, L.; Spruill, C.L.; Bond, J.E. Arthropod phylogenetics in light of three novel *millipede* (Myriapoda: Diplopoda) mitochondrial genomes with comments on the appropriateness of mitochondrial genome sequence data for inferring deep level relationships. *PLoS ONE* **2013**, *8*, e68005.
12. Dong, Y.; Zhu, L.; Bai, Y.; Ou, Y.; Wang, C. Complete mitochondrial genomes of two flat-backed *millipedes* by next-generation sequencing (Diplopoda, Polydesmida). *ZooKeys* **2016**, *637*, 1–20.
13. Podsiadlowski, L.; Kohlhagen, H.; Koch, M. The complete mitochondrial genome of *Scutigera caudata* (Myriapoda: Symphyla) and the phylogenetic position of Symphyla. *Mol. Phylogenet. Evol.* **2007**, *45*, 251–260.
14. Gai, Y.; Song, D.; Sun, H.; Yang, Q.; Zhou, K. The complete mitochondrial genome of *Symphylella* sp. (Myriapoda: Symphyla): Extensive gene order rearrangement and evidence in favor of Progoneata. *Mol. Phylogenet. Evol.* **2008**, *49*, 574–585.
15. Dong, Y.; Sun, H.; Guo, H.; Pan, D.; Qian, C.; Hao, S.; Zhou, K. The complete mitochondrial genome of *Paupopus longiramus* (Myriapoda: Pauropoda): Implications on early diversification of the myriapods revealed from comparative analysis. *Gene* **2012**, *505*, 57–65.
16. Park, S.J.; Lee, Y.S.; Hwang, U.W. The complete mitochondrial genome of the sea spider *Achelia bituberculata* (Pycnogonida, Ammotheidae): arthropod ground pattern of gene arrangement. *BMC Genom.* **2007**, *8*, 343.
17. Masta, S.E.; Boore, J.L. Parallel evolution of truncated transfer RNA genes in arachnid mitochondrial genomes. *Mol. Biol. Evol.* **2008**, *25*, 949–959.
18. Lavrov, D. V.; Boore, J. L.; Brown, W. M. The complete mitochondrial DNA sequence of the horseshoe crab *Limulus polyphemus*. *Mol. Biol. Evol.* **2000**, *17*, 813–824.
19. Shingate, P.; Ravi, V.; Prasad, A.; Tay, B.H.; Venkatesh, B. Chromosome-level genome assembly of the coastal horseshoe crab (*Tachypleus gigas*). *Mol. Ecol. Resour.* **2020**, *20*, 1748–1760.
20. Wilson, K.; Cahill, V.; Ballment, E.; Benzie, J. The complete sequence of the mitochondrial genome of the crustacean *Penaeus monodon*: are malacostracan crustaceans more closely related to insects than to branchiopods? *Mol. Biol. Evol.* **2000**, *17*, 863–874.
21. Lavrov, D.V.; Brown, W.M.; Boore, J.L. Phylogenetic position of the Pentastomida and (pan) crustacean relationships. *Proc. R. Soc. London. Ser. B Biol. Sci.* **2004**, *271*, 537–544.
22. Podsiadlowski, L. The mitochondrial genome of the bristletail *Petrobius brevistylis* (Archaeognatha: Machilidae). *Insect Mol. Biol.* **2006**, *15*, 253–258.
23. Cook, C.E.; Yue, Q.; Akam, M. Mitochondrial genomes suggest that hexapods and crustaceans are mutually paraphyletic. *Proc. R. Soc. B Biol. Sci.* **2005**, *272*, 1295–1304.
24. Clary, D.O.; Wolstenholme, D.R. The ribosomal RNA genes of *Drosophila* mitochondrial DNA. *Nucleic Acids Res.* **1985**, *13*, 4029–4045.
25. Carapelli, A.; Nardi, F.; Dallai, R.; Boore, J.; Lio, P.; Frati, F. Relationships between hexapods and crustaceans based on four mitochondrial genes. *Crustacean Issues* **2005**, *16*, 295.
26. Webster, B.L.; Copley, R.R.; Jenner, R.A.; Mackenzie-Dodds, J.A.; Boursat, S.J.; Rota-Stabelli, O.; Littlewood, D.; Telford, M.J. Mitogenomics and phylogenomics reveal priapulid worms as extant models of the ancestral Ecdysozoan. *Evol. Dev.* **2006**, *8*, 502–510.
27. Ding, J.; Lan, H.; Xu, W.; Chen, Y.N.; Wu, H.; Jiang, H.M.; Wang, J.C.; Wu, Y.B.; Liu, H. Two complete mitochondrial genomes in *Scolopendra* and a comparative analysis of tRNA rearrangements in centipedes. *Mol. Biol. Rep.* **2022**, *49*, 6173–6180.

- 
28. Gai, Y.; Ma, H.; Ma, J.; Li, C.; Yang, Q. The complete mitochondrial genome of *Scolopocryptops* sp. (Chilopoda: Scolopendromorpha: Scolopocryptopidae). *Mitochondrial DNA* **2014**, *25*, 192–193.

**Table S2.** Optimal partition strategy and evolutionary models used in phylogenetic analyses.

| Dataset  | Subset | Best Model  | Sites | Partiotion Names                                      |
|----------|--------|-------------|-------|-------------------------------------------------------|
| AA       | 1      | MTART+I+G+F | 646   | atp8, atp6, nad3, nad2, nad6                          |
|          | 2      | MTART+I+G   | 493   | cox1                                                  |
|          | 3      | MTART+I+G   | 452   | cox3, cox2                                            |
|          | 4      | MTART+I+G   | 322   | cob                                                   |
|          | 5      | MTART+I+G+F | 1,024 | nad5, nad4, nad1, nad4L                               |
| PCG12RNA | 1      | GTR+I+G     | 721   | cox2_pos1, cox1_pos1                                  |
|          | 2      | GTR+I+G     | 504   | cox1_pos2                                             |
|          | 3      | TVM+I+G     | 293   | nad1_pos1                                             |
|          | 4      | GTR+I+G     | 377   | nad4L_pos2, nad1_pos2                                 |
|          | 5      | GTR+I+G     | 1,065 | cox2_pos2, cob_pos2, cox3_pos2, atp6_pos2             |
|          | 6      | GTR+I+G     | 559   | atp8_pos1, nad6_pos1, nad3_pos1, nad2_pos1            |
|          | 7      | TVM+I+G     | 559   | atp8_pos2, nad6_pos2, nad2_pos2, nad3_pos2            |
|          | 8      | GTR+I+G     | 848   | atp6_pos1, cox3_pos1, cob_pos1                        |
|          | 9      | GTR+I+G     | 1027  | nad4L_pos1, nad5_pos1, nad4_pos1                      |
|          | 10     | GTR+I+G     | 943   | nad4_pos2, nad5_pos2                                  |
|          | 11     | GTR+I+G     | 1,647 | rrnL, rrnS                                            |
| PCGRNA   | 1      | GTR+I+G     | 721   | cox2_pos1, cox1_pos1                                  |
|          | 2      | GTR+I+G     | 504   | cox1_pos2                                             |
|          | 3      | GTR +G      | 1,347 | cox2_pos3, cox1_pos3, cox3_pos3, cob_pos3             |
|          | 4      | TVM+I+G     | 908   | rrnS, nad1_pos1                                       |
|          | 5      | GTR+I+G     | 377   | nad1_pos2, nad4L_pos2                                 |
|          | 6      | TVM+G       | 1,320 | nad4_pos3, nad4L_pos3, nad5_pos3, nad1_pos3           |
|          | 7      | GTR+I+G     | 1,065 | cox2_pos2, cob_pos2, atp6_pos2, cox3_pos2             |
|          | 8      | GTR+I+G     | 781   | nad3_pos1, nad2_pos1, atp6_pos1, nad6_pos1, atp8_pos1 |
|          | 9      | TVM+I+G     | 559   | atp8_pos2, nad6_pos2, nad3_pos2, nad2_pos2            |
|          | 10     | GTR+G       | 781   | nad2_pos3, nad3_pos3, atp6_pos3, nad6_pos3, atp8_pos3 |
|          | 11     | GTR+I+G     | 626   | cob_pos1, cox3_pos1                                   |
|          | 12     | GTR+I+G     | 1,027 | nad4L_pos1, nad5_pos1, nad4_pos1                      |
|          | 13     | GTR+I+G     | 943   | nad5_pos2, nad4_pos2                                  |
|          | 14     | GTR+I+G     | 1,032 | rrnL                                                  |

**Table S3.** Mitochondrial genomes Organization of *Scolopendra subspinipes*.

| Gene         | Strand | Location      | Length | Start /Stop Codon | Intergenic Nucleotides |
|--------------|--------|---------------|--------|-------------------|------------------------|
| <i>trnI</i>  | F      | 1-61          | 61     |                   | -2                     |
| <i>trnQ</i>  | R      | 60-129        | 70     |                   | -3                     |
| <i>trnM</i>  | F      | 127-194       | 68     |                   | -1                     |
| <i>nad2</i>  | F      | 194-1,163     | 970    | ATT/T--           | 0                      |
| <i>trnW</i>  | F      | 1,164-1242    | 79     |                   | -27                    |
| <i>trnC</i>  | R      | 1,216-1,277   | 62     |                   | -4                     |
| <i>trnY</i>  | R      | 1,274-1,334   | 61     |                   | -6                     |
| <i>cox1</i>  | F      | 1,299-2,864   | 1,566  | TTA/TAA           | 3                      |
| <i>cox2</i>  | F      | 2,868-3,539   | 672    | ATG/TAA           | -7                     |
| <i>trnK</i>  | F      | 3,538-3,604   | 67     |                   | 0                      |
| <i>trnD</i>  | F      | 3,604-3,664   | 61     |                   | -1                     |
| <i>atp8</i>  | F      | 3,664-3,819   | 156    | ATT/TAA           | -7                     |
| <i>atp6</i>  | F      | 3,816-4,479   | 667    | ATA/T--           | 0                      |
| <i>cox3</i>  | F      | 4,480-5262    | 783    | ATG/TAA           | 4                      |
| <i>trnG</i>  | F      | 5,267-5,330   | 64     |                   | -1                     |
| <i>nad3</i>  | F      | 5,330-5,678   | 349    | ATA/T--           | 0                      |
| <i>trnA</i>  | F      | 5,679-5,740   | 62     |                   | 6                      |
| <i>trnR</i>  | F      | 5,747-5,806   | 60     |                   | 1                      |
| <i>trnN</i>  | F      | 5,808-5,863   | 56     |                   | -3                     |
| <i>trnS1</i> | F      | 5,861-5,912   | 52     |                   | -1                     |
| <i>trnE</i>  | F      | 5,912-5,975   | 64     |                   | -5                     |
| <i>trnF</i>  | R      | 5,971-6,031   | 61     |                   | 2                      |
| <i>nad5</i>  | R      | 6,034-7,732   | 1,699  | TTA/TAA           | 1                      |
| <i>trnH</i>  | R      | 7,734-7,794   | 61     |                   | 1                      |
| <i>nad4</i>  | R      | 7,794-9,125   | 1,332  | ATG/T             | -7                     |
| <i>nad4L</i> | R      | 9,119-9,403   | 285    | ATA/TAA           | 7                      |
| <i>trnT</i>  | F      | 9,411-9,472   | 62     |                   | -2                     |
| <i>trnP</i>  | R      | 9,471-9,528   | 58     |                   | 2                      |
| <i>nad6</i>  | F      | 9,525-9,998   | 474    | ATT/TAA           | 47                     |
| <i>cob</i>   | F      | 10,044-11,155 | 1,112  | ATG/TAA           | 0                      |
| <i>trnS2</i> | F      | 11,156-11,221 | 66     |                   | 1                      |
| <i>nad1</i>  | R      | 11,223-12,140 | 918    | ATT/TAG           | 1                      |
| <i>trnL2</i> | R      | 12,142-12,203 | 62     |                   | -9                     |
| <i>trnL1</i> | R      | 12,195-12,254 | 60     |                   | 0                      |
| <i>rrnL</i>  | R      | 12,255-13,398 | 1,144  |                   | 0                      |
| <i>trnV</i>  | F      | 13,399-13,458 | 60     |                   | 0                      |
| <i>rrnS</i>  | R      | 13,459-13,918 | 460    |                   | 0                      |
| CR           | F      | 13,919-14,637 | 719    |                   | 0                      |

**Table S4.** Mitochondrial genomes Organization of *Mecistocephalus marmoratus*.

| Gene         | Strand | Location      | Length | Start /Stop Codon | Intergenic Nucleotides |
|--------------|--------|---------------|--------|-------------------|------------------------|
| <i>cox1</i>  | F      | 1-1,536       | 1,536  | ATA/TAA           | 0                      |
| <i>cox2</i>  | F      | 1,536-2,216   | 681    | ATG/TAA           | -1                     |
| <i>trnK</i>  | F      | 2,215-2,279   | 65     |                   | -2                     |
| <i>trnD</i>  | F      | 2,281-2,342   | 62     |                   | 1                      |
| <i>atp8</i>  | F      | 2,343-2,498   | 156    | ATT/TAA           | 0                      |
| <i>atp6</i>  | F      | 2,492-3,160   | 669    | ATG/TAA           | -7                     |
| <i>cox3</i>  | F      | 3,160-3,945   | 786    | ATG/TAA           | -1                     |
| <i>trnG</i>  | F      | 3,945-4,005   | 61     |                   | -1                     |
| <i>trnA</i>  | F      | 4,006-4,065   | 60     |                   | 0                      |
| <i>trnR</i>  | F      | 4,067-4,124   | 58     |                   | 1                      |
| <i>trnS1</i> | F      | 4,129-4,187   | 59     |                   | 4                      |
| <i>trnE</i>  | F      | 4,195-4,251   | 57     |                   | 7                      |
| <i>trnT</i>  | F      | 4,255-4,306   | 52     |                   | 3                      |
| <i>nad6</i>  | F      | 4,311-4,814   | 504    | ATA/TAA           | 4                      |
| <i>cob</i>   | F      | 4,818-5,954   | 1,137  | ATG/TAA           | 3                      |
| <i>trnS2</i> | R      | 5,954-6,024   | 71     |                   | -1                     |
| <i>trnQ</i>  | F      | 6,023-6,091   | 69     |                   | -2                     |
| <i>trnM</i>  | F      | 6,083-6,147   | 65     |                   | -9                     |
| <i>nad2</i>  | F      | 6,148-7,137   | 990    | ATC/TAA           | 0                      |
| <i>trnW</i>  | F      | 7,136-7,201   | 66     |                   | -2                     |
| <i>nad3</i>  | F      | 7,208-7,561   | 354    | ATG/TAA           | 6                      |
| <i>trnN</i>  | F      | 7,561-7,633   | 73     |                   | -1                     |
| <i>trnF</i>  | R      | 7,627-7,689   | 63     |                   | -7                     |
| <i>nad5</i>  | R      | 7,688-9,382   | 1,695  | ATT/TAA           | -2                     |
| <i>trnH</i>  | R      | 9,390-9,451   | 62     |                   | 7                      |
| <i>nad4</i>  | R      | 9,452-10,775  | 1,324  | ATG/T--           | 0                      |
| <i>nad4L</i> | R      | 10,769-11,047 | 279    | ATT/TAG           | -7                     |
| <i>trnP</i>  | R      | 11,051-11,111 | 61     |                   | 3                      |
| <i>nad1</i>  | R      | 11,112-12,036 | 925    | ATA/T--           | 0                      |
| <i>trnL2</i> | R      | 12,038-12,099 | 62     |                   | 1                      |
| <i>rrnL</i>  | R      | 12,100-13,414 | 1,315  |                   | 0                      |
| <i>trnV</i>  | R      | 13,415-13,481 | 67     |                   | 0                      |
| <i>rrnS</i>  | R      | 13,482-14,246 | 765    |                   | 0                      |
| <i>trnL1</i> | R      | 14,247-14,317 | 71     |                   | 0                      |
| CR           | F      | 14,318-15,080 | 766    |                   | 0                      |
| <i>trnC</i>  | F      | 15,084-15,137 | 54     |                   | 0                      |
| <i>trnY</i>  | R      | 15,145-15,209 | 65     |                   | 7                      |
| <i>trnI</i>  | F      | 15,211-15,277 | 67     |                   | 1                      |

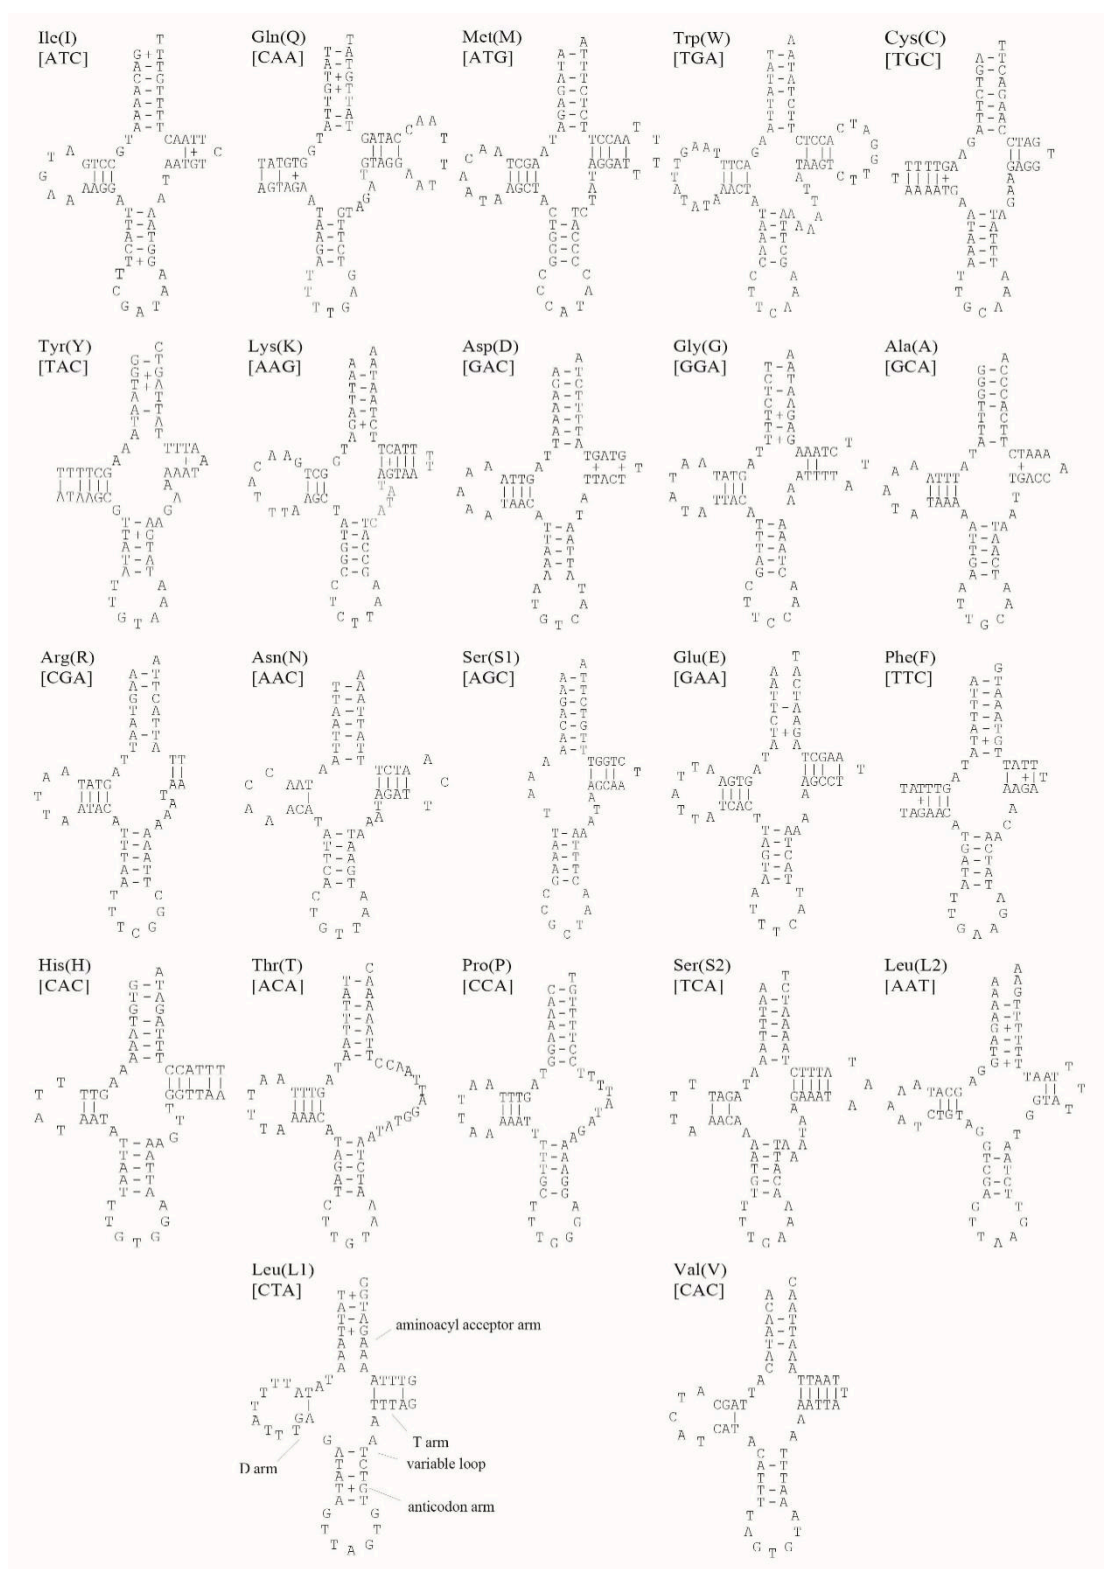

**Figure S1.** Predicted secondary structure of the 22 tRNAs in the *Scolopendra subspinipes* mitogenome Dashes (–) indicate Watson–Crick base pairing.



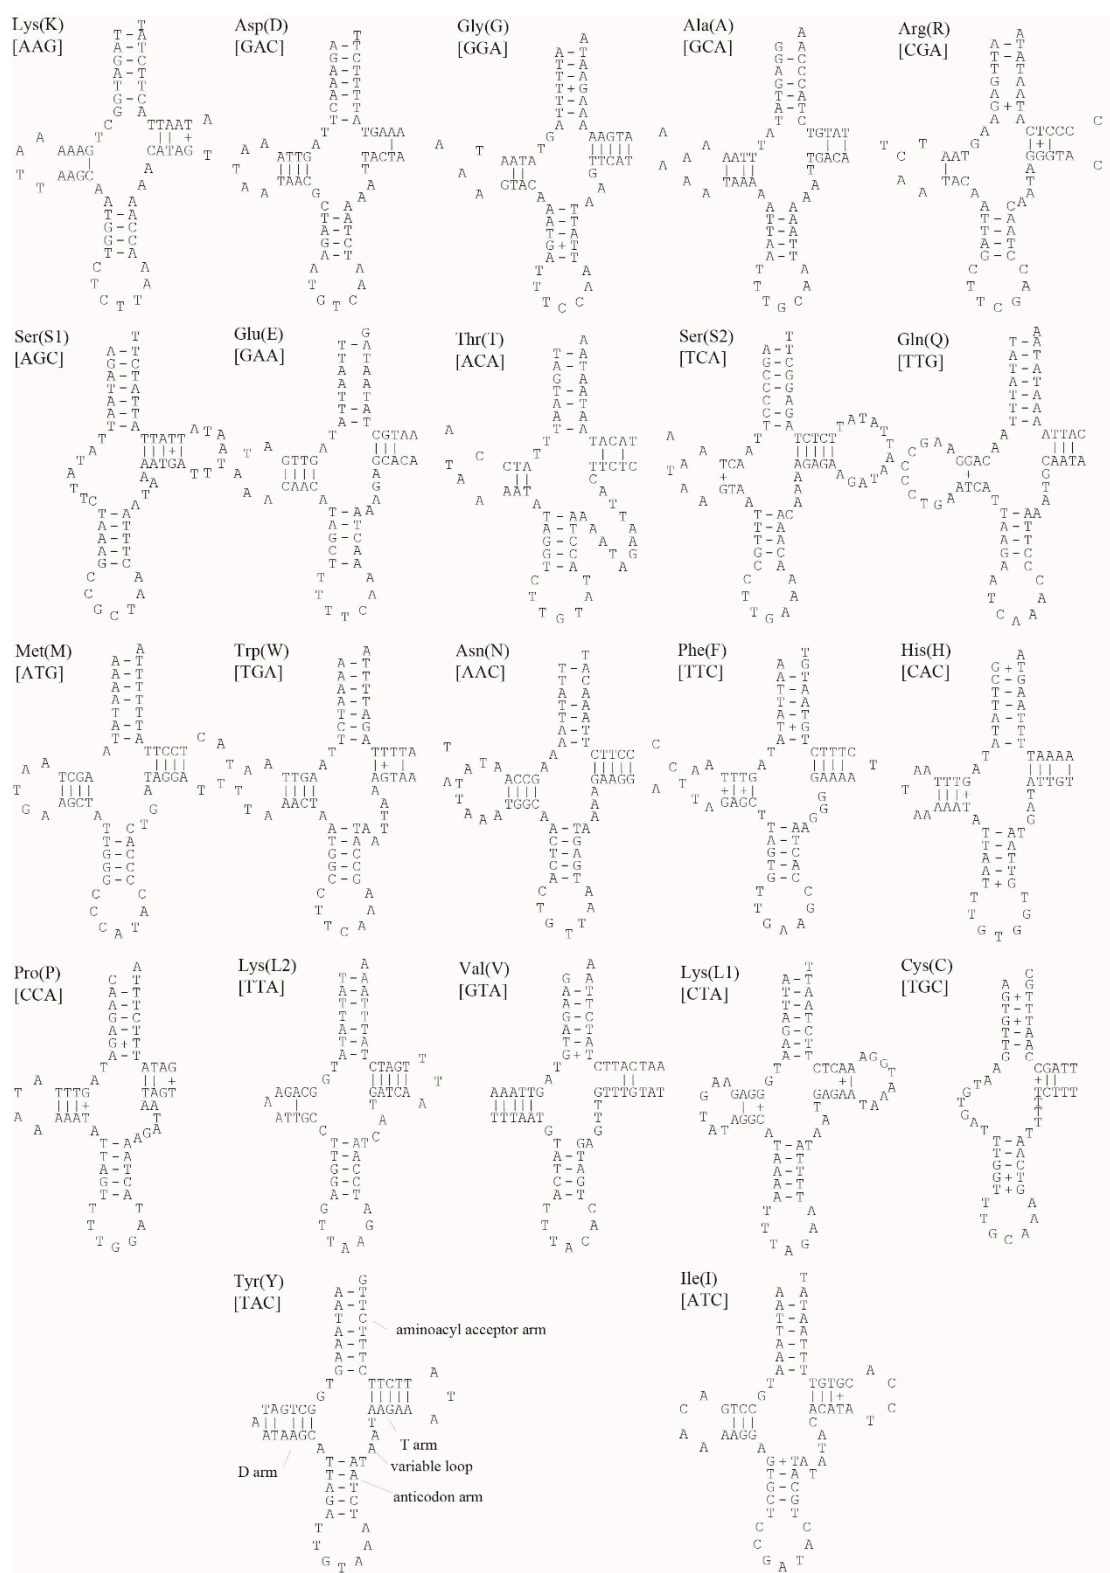

**Figure S2.** Predicted secondary structure of the 22 tRNAs in the *Mecistocephalus marmoratus* mitogenome Dashes (-) indicate Watson-Crick base pairing.
